# Supplementary material for: Identifying metabolic enzymes with multiple types of association evidence
Source: Springer Nature journal article supplement (doi:10.1186/1471-2105-7-177), 2006-03-29
Supplement: Additional file 1 [file 1471-2105-7-177-s1.pdf]

Figure 1.

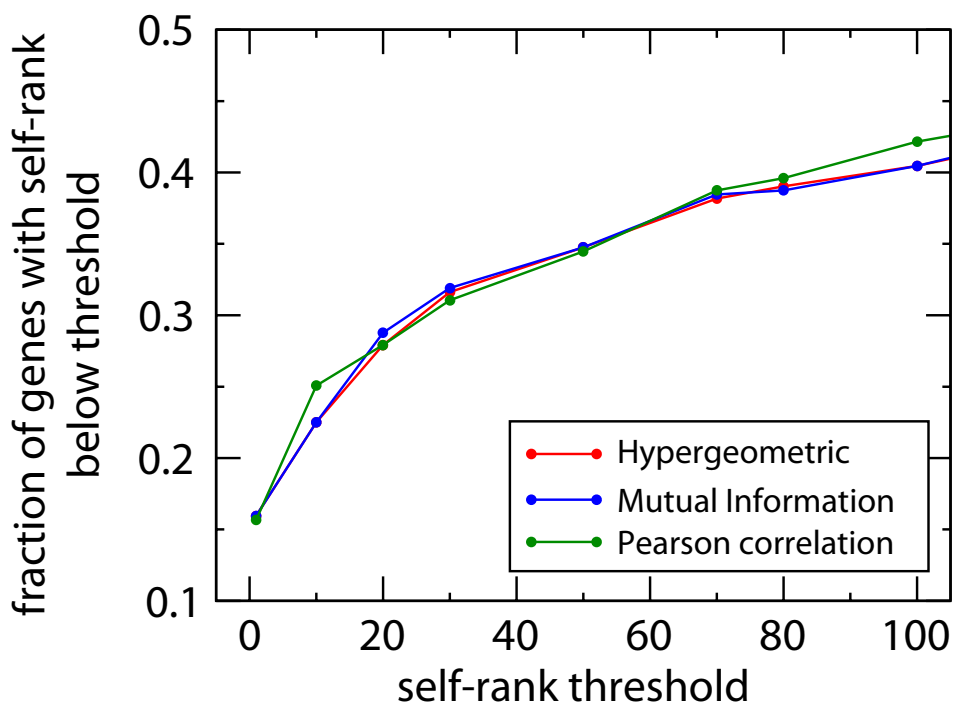

**Performance of different profile similarity measures.** *E. coli* self-rank performance based on the phylogenetic profile associations with the first layer of the neighborhood is shown for scores calculated using Hypergeometric probability, mutual information and Pearson linear correlation. BLAST-based orthology dataset was used.
