# Supplementary material for: Identifying metabolic enzymes with multiple types of association evidence
Source: Springer Nature journal article supplement (doi:10.1186/1471-2105-7-177), 2006-03-29
Supplement: Additional file 2 [file 1471-2105-7-177-s2.pdf]

Figure 2.

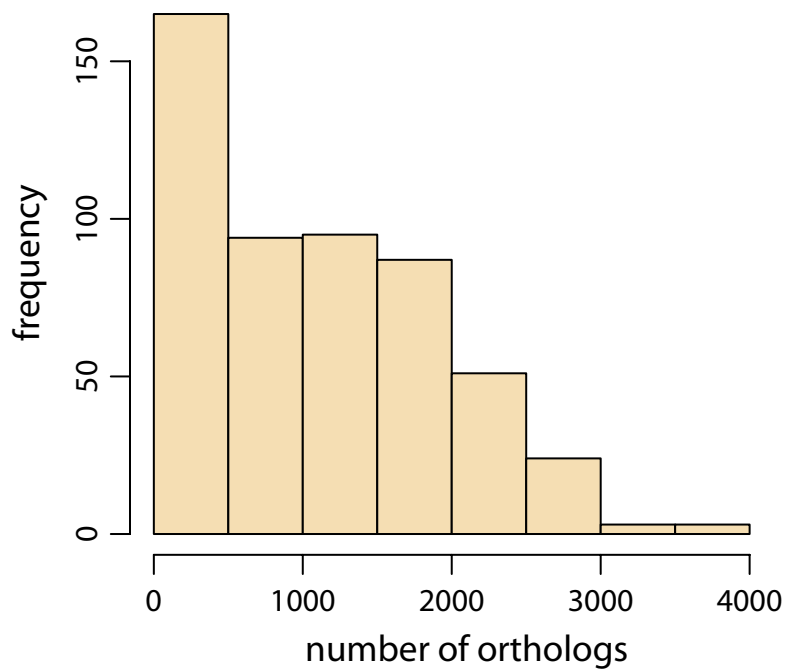

**Distribution of the number of orthologs per organism.** Distribution of the number of orthologs of *E. coli* genes is shown for the organisms included in the BLAST-based orthology dataset. Organisms containing orthologs for fewer than 4% of *E. coli* genes were excluded.
