# Supplementary material for: Identifying metabolic enzymes with multiple types of association evidence
Source: Springer Nature journal article supplement (doi:10.1186/1471-2105-7-177), 2006-03-29
Supplement: Additional file 16 [file 1471-2105-7-177-s16.pdf]

|       | <i>E. coli</i> |       |       | <i>S. cerevisiae</i> |       |       |
|-------|----------------|-------|-------|----------------------|-------|-------|
|       | Metabolic      | Other | All   | Metabolic            | Other | All   |
| COG   | 98.7%          | 76.8% | 81.3% | 92.1%                | 31.3% | 46.7% |
| KEGG  | 99.7%          | 97.6% | 98.0% | 96.8%                | 88.0% | 89.0% |
| BLAST | 98.7%          | 98.9% | 99.2% | 98.7%                | 94.3% | 94.9% |

**Gene coverage of different orthology datasets.** The table shows fraction of metabolic, non-metabolic (other) and all genes of *E. coli* and *S. cerevisiae* genomes covered by COGs, KEGG-based orthology dataset (best bi-directional hits) and BLAST-based dataset.
